# Supplementary material for: Design of 3d transition metal-embedded asymmetric HMo 2 CF for electrocatalytic conversion of N 2 to NH 3
Source: Royal Society of Chemistry journal article supplement (doi:10.1039/d4cp03343d), 2024-11-27
Supplement: d4cp03343d1.pdf [file d4cp03343d1.pdf]

## Supporting Information

### **Design of 3d Transition Metal Embedded Asymmetric HMo<sub>2</sub>CF for N<sub>2</sub> Electrocatalytic Conversion to NH<sub>3</sub>**

Lu Deng<sup>a,b</sup>, Fei Wu<sup>a,b</sup>, Wanbin Guan<sup>\*b,c</sup>, Zhiyi Lu<sup>b,c</sup>, Qiuju Zhang<sup>\*b,c</sup>

<sup>a</sup> School of Materials Science & Chemical Engineering, Ningbo University, Ningbo, Zhejiang 315211, P. R. China

<sup>b</sup> Zhejiang Key Laboratory of Advanced Fuel Cells and Electrolyzers Technology, Ningbo Institute of Material Technology and Engineering, Chinese Academy of Sciences, Ningbo, Zhejiang, 315201, China

<sup>c</sup> University of Chinese Academy of Sciences, 100049, Beijing, P. R. China

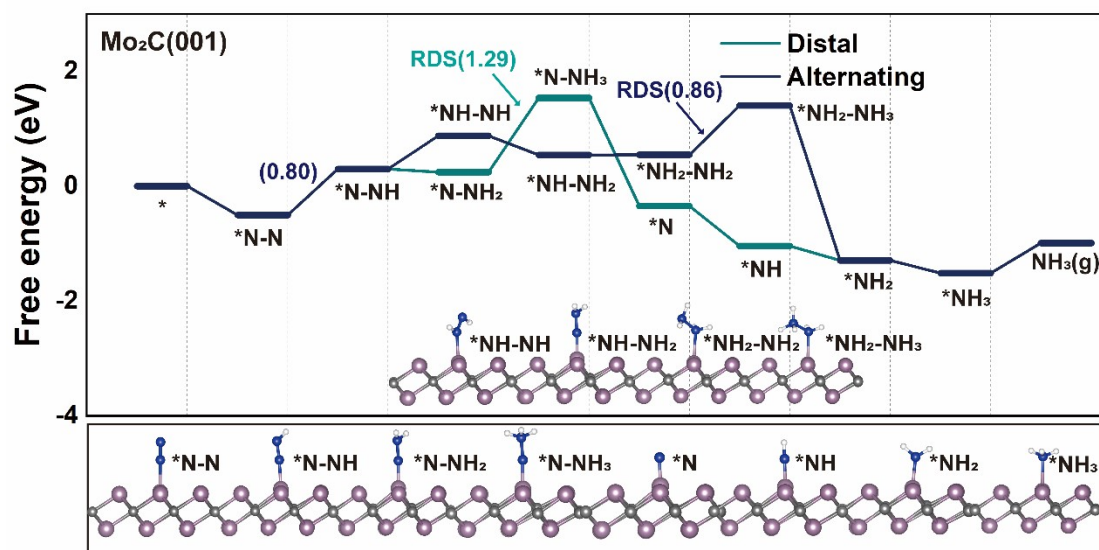

**Figure S1** Free energy profile of the  $N_2$  reduction reaction by end-on adsorption on  $Mo_2C(001)$  through distal and alternating mechanisms.

**Table S1** Computed adsorption energies of  $N_2$  on different  $TM_A/HMo_2CF_v$ .

| TM        | Adsorption energy (eV) |                | Charge variation * (e) | Charge gain on $N_2$ -end on (e) | Charge gain on $N_2$ -side on (e) |
|-----------|------------------------|----------------|------------------------|----------------------------------|-----------------------------------|
|           | $N_2$ -end on          | $N_2$ -side on |                        |                                  |                                   |
| $Ti_A$    | -0.80                  | -0.81          | +1.39                  | +1.43                            | +1.41                             |
| $V_A$     | -1.05                  | -0.05          | +1.16                  | +1.24                            | +1.15                             |
| $Cr_A$    | -1.24                  | -0.11          | +0.89                  | +0.94                            | +0.92                             |
| $Mn_A$    | -1.33                  | -0.13          | +0.76                  | +0.82                            | +0.73                             |
| $Fe_A$    | -1.19                  | -0.02          | +0.48                  | +0.58                            | +0.54                             |
| $Co_A$    | -0.98                  | 0.14           | +0.37                  | +0.51                            | +0.44                             |
| $Ni_A$    | -0.73                  | -0.75          | +0.34                  | +0.45                            | +0.44                             |
| $Mo^{Fv}$ | -1.14                  | -0.15          | +0.86                  | +0.90                            | +1.41                             |
| $Mo^{Hv}$ | -1.01                  |                | +0.90                  | +0.99                            | +0.88                             |

**Table S2** Computed adsorption energies of N<sub>2</sub> on different TM<sub>B</sub>/HMo<sub>2</sub>CF<sub>v</sub>.

| TM                     | Adsorption energy (eV) |                         | Charge variation * (e) | Charge gain on N <sub>2</sub> -end on (e) | Charge gain on N <sub>2</sub> -side on (e) |
|------------------------|------------------------|-------------------------|------------------------|-------------------------------------------|--------------------------------------------|
|                        | N <sub>2</sub> -end on | N <sub>2</sub> -side on |                        |                                           |                                            |
| <b>Ti<sub>A</sub></b>  | -1.13                  | -0.18                   | +0.83                  | +0.96                                     | +0.85                                      |
| <b>V<sub>A</sub></b>   | -1.12                  | -0.15                   | +0.85                  | +0.92                                     | +0.89                                      |
| <b>Cr<sub>A</sub></b>  | -1.10                  | -0.15                   | +0.87                  | +0.95                                     | +0.92                                      |
| <b>Mn<sub>A</sub></b>  | -1.09                  | -0.16                   | +0.89                  | +0.98                                     | +0.95                                      |
| <b>Fe<sub>A</sub></b>  | -1.09                  | -0.16                   | +0.91                  | +0.98                                     | +0.96                                      |
| <b>Co<sub>A</sub></b>  | -1.09                  | -0.17                   | +0.93                  | +0.99                                     | +0.96                                      |
| <b>Ni<sub>A</sub></b>  | -0.75                  | -0.17                   | +0.94                  | +1.05                                     | +0.96                                      |
| <b>Mo<sup>Fv</sup></b> | -1.14                  | -0.15                   | +0.86                  | +0.90                                     | +0.88                                      |

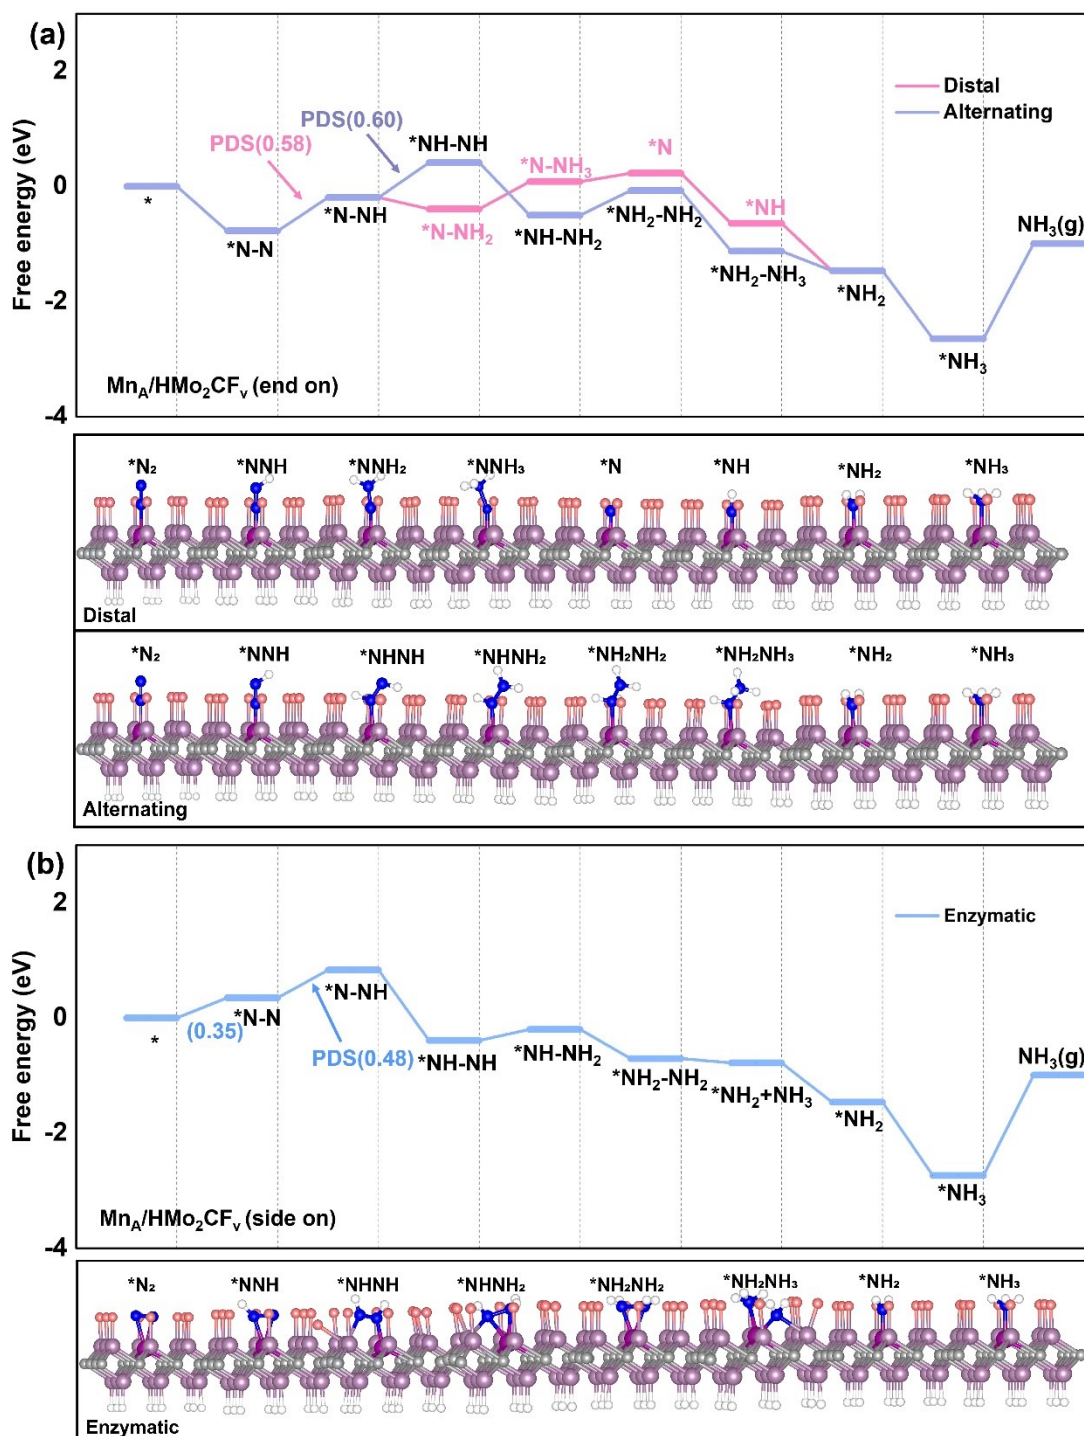

**Figure S2** Free energy profile of the  $\text{N}_2$  reduction reaction on  $\text{Mn}_A/\text{HMo}_2\text{CF}_v$  through (a) distal, alternating, and (b) enzymatic mechanisms.

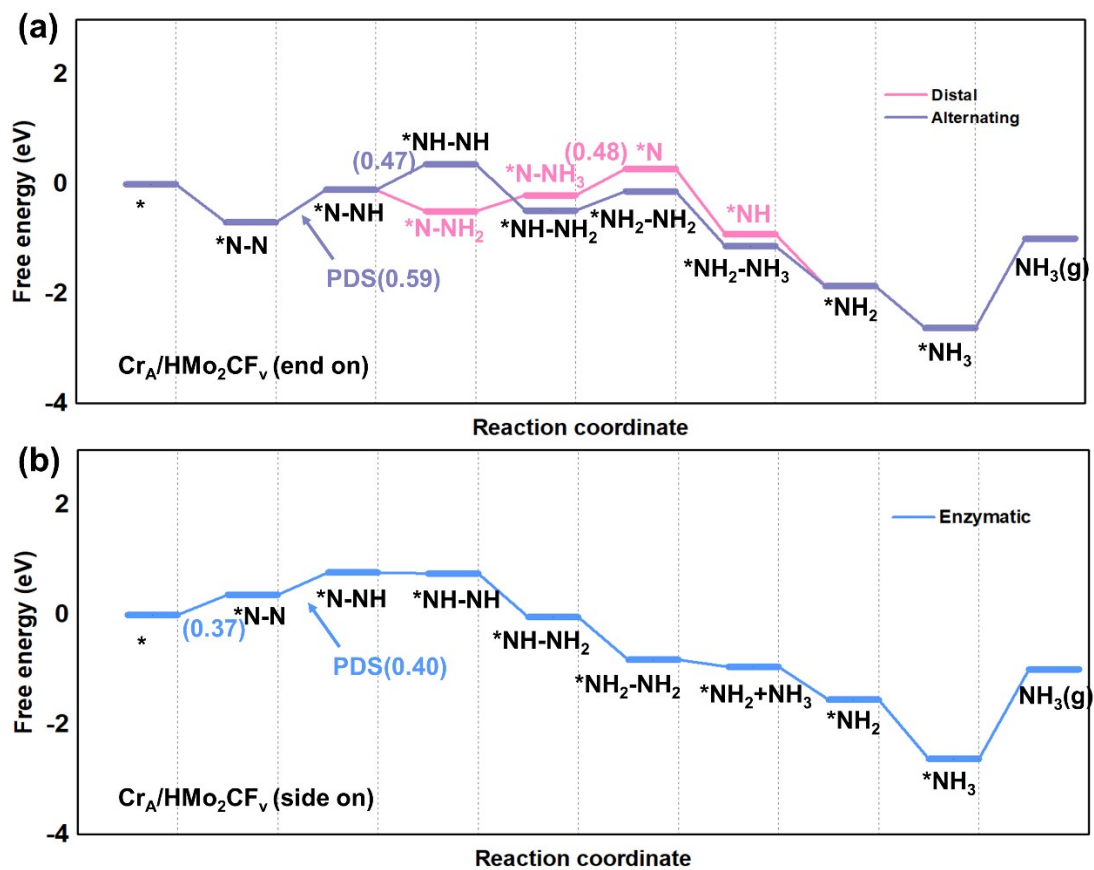

**Figure S3** Free energy profile of the  $N_2$  reduction reaction on  $Cr_A/HMo_2CF_v$ , through (a) distal, alternating, and (b) enzymatic mechanisms.

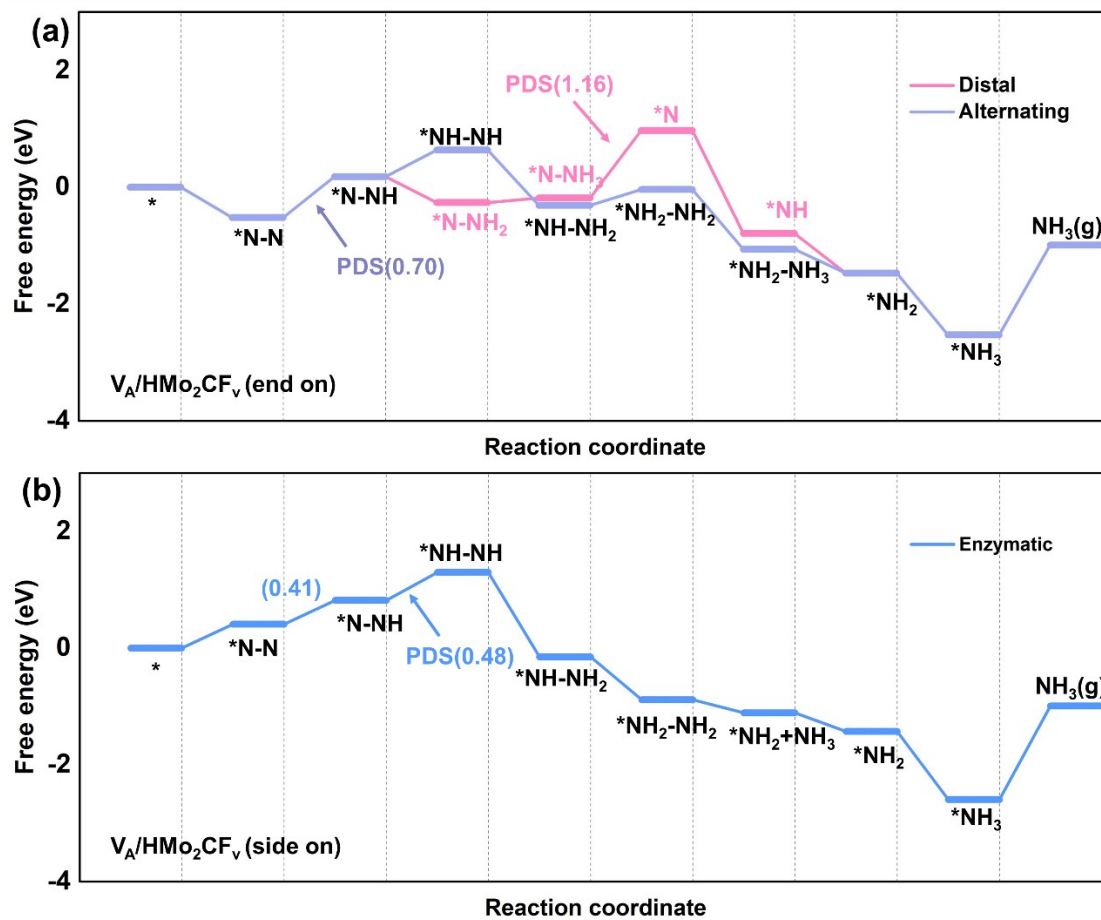

**Figure S4** Free energy profile of the  $N_2$  reduction reaction on  $V_A/HMo_2CF_v$  through (a) distal, alternating, and (b) enzymatic mechanisms.

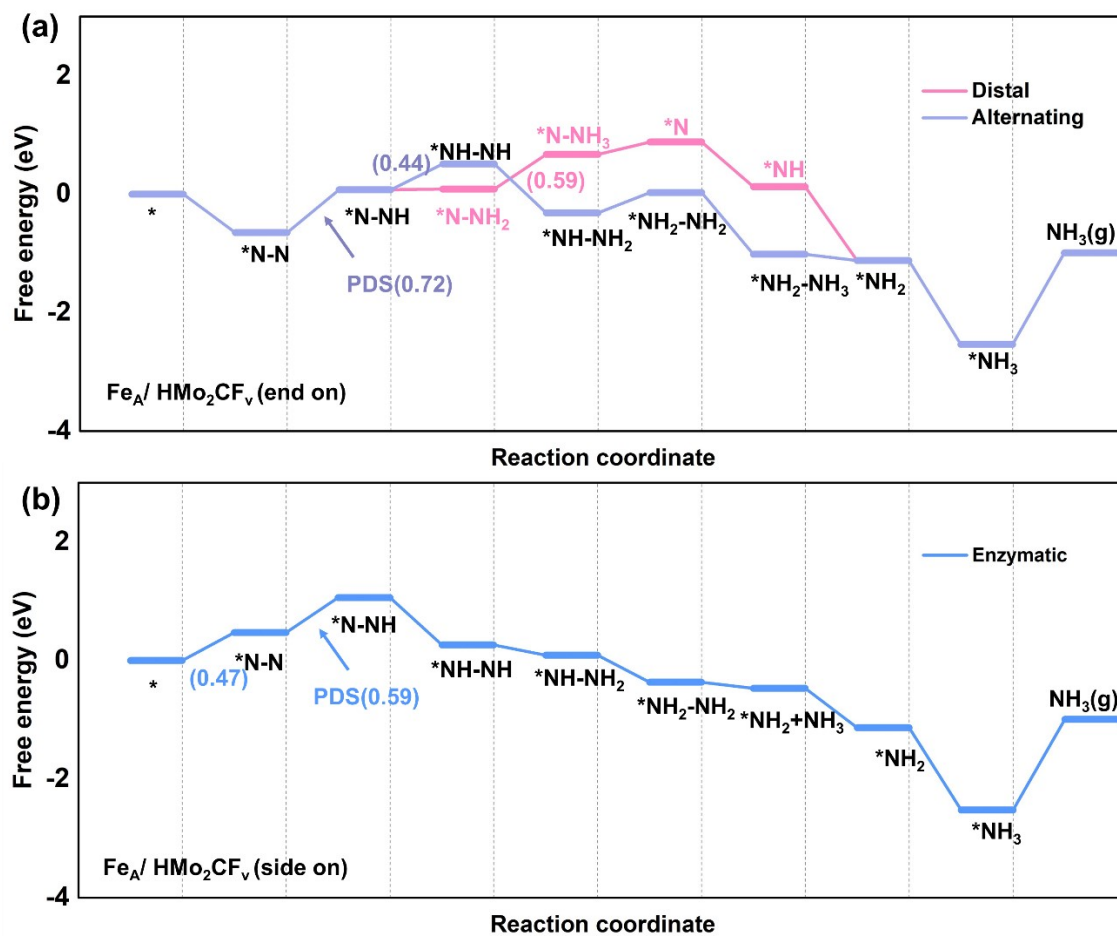

**Figure S5** Free energy profile of the  $N_2$  reduction reaction on  $Fe_A/HMo_2CF_v$  through (a) distal, alternating, and (b) enzymatic mechanisms.

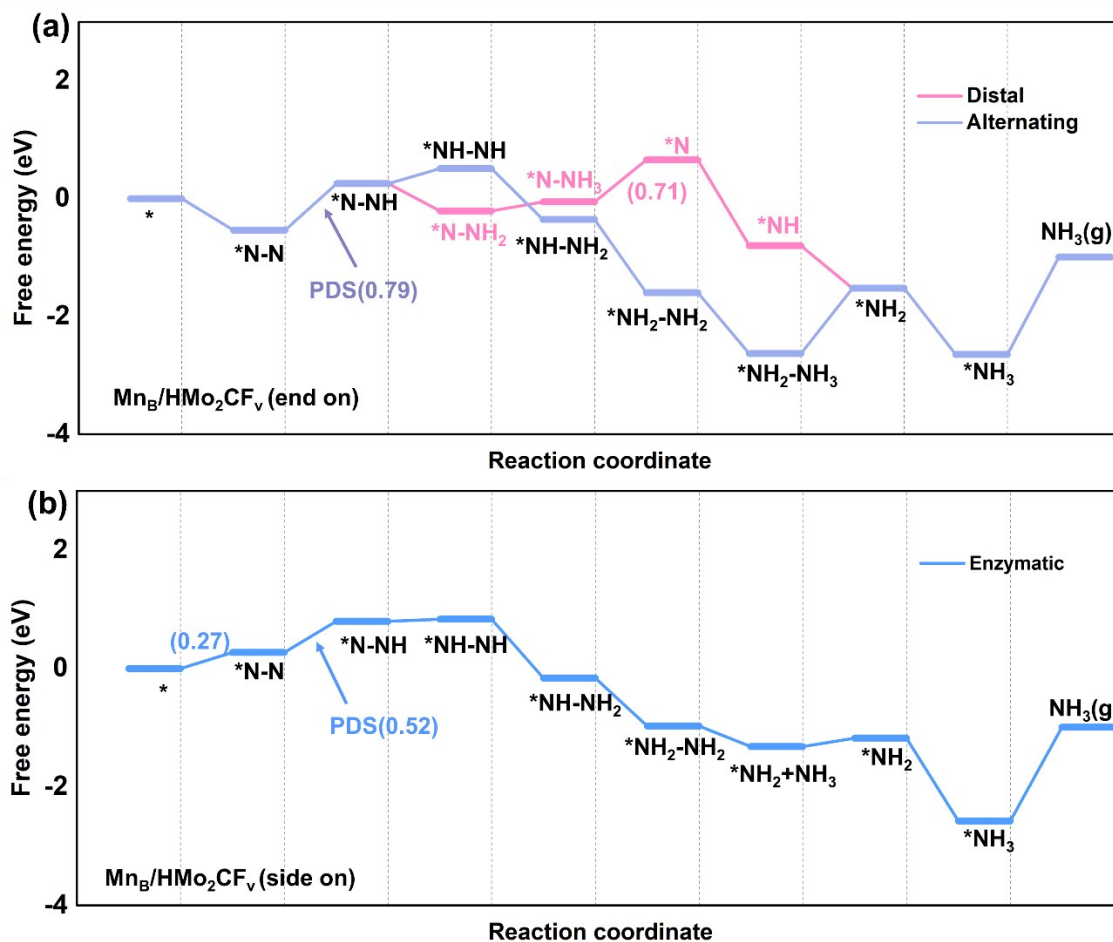

**Figure S6** Free energy profile of the  $N_2$  reduction reaction on  $Mn_B/HMo_2CF_v$  through (a) distal, alternating, and (b) enzymatic mechanisms.



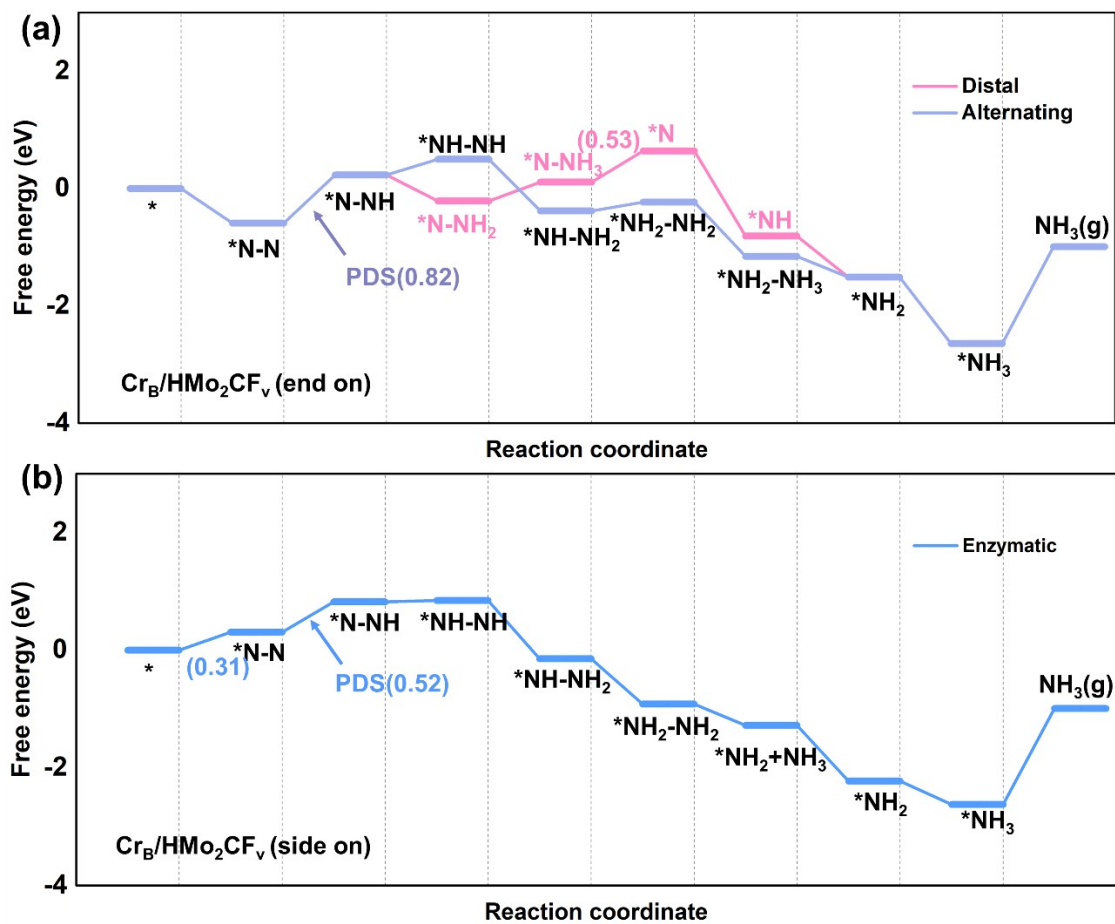

**Figure S7** Free energy profile of the N<sub>2</sub> reduction reaction on Cr<sub>B</sub>/HMo<sub>2</sub>CF<sub>v</sub> through (a) distal, alternating, and (b) enzymatic mechanisms.

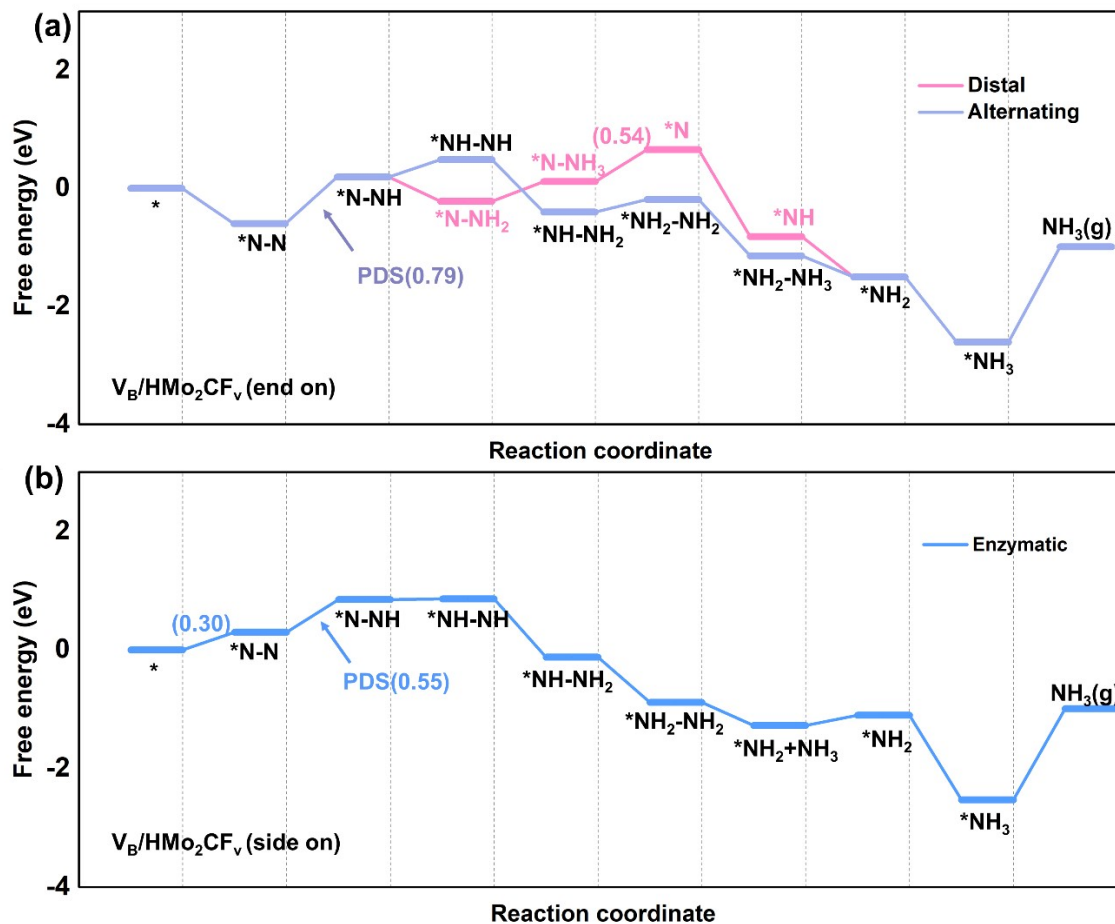

**Figure S8** Free energy profile of the  $N_2$  reduction reaction on  $V_B/HMO_2CF_v$  through (a) distal, alternating, and (b) enzymatic mechanisms.

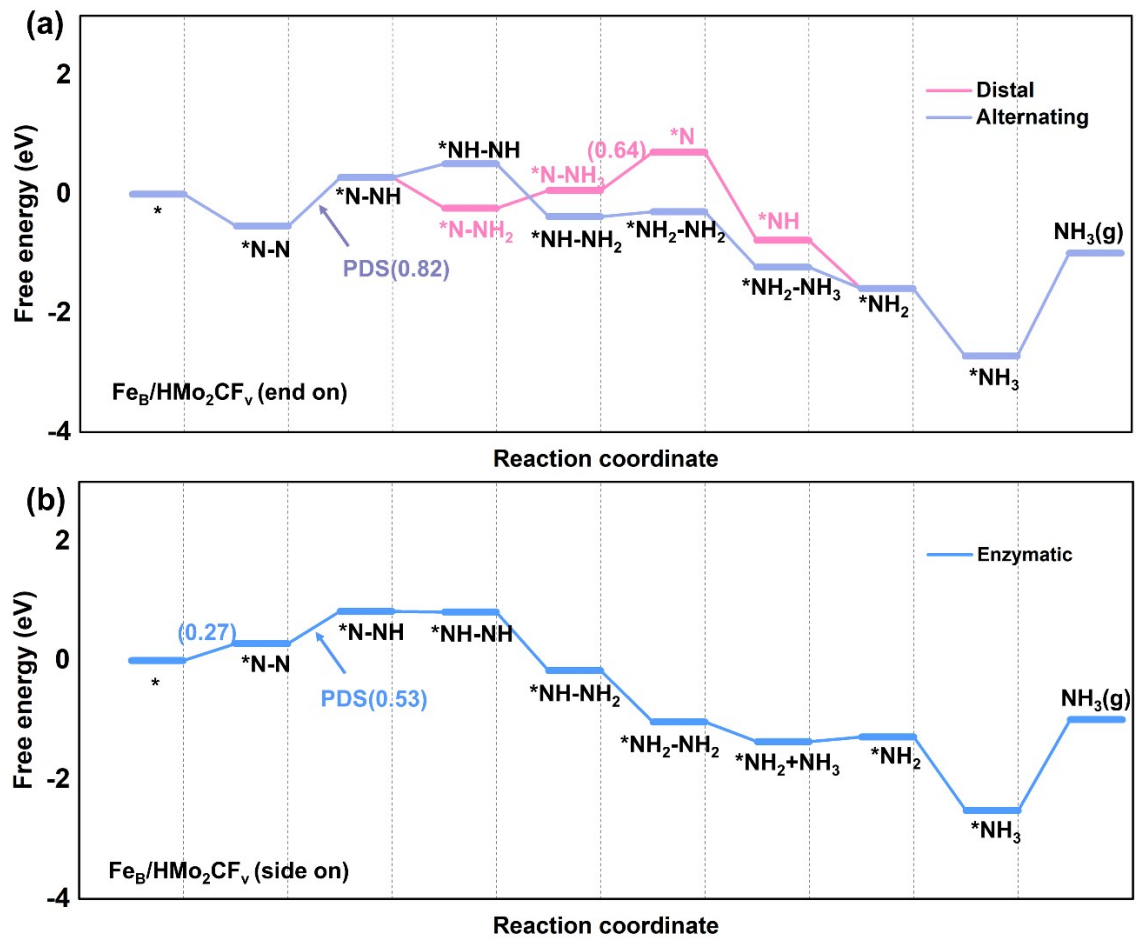

**Figure S9** Free energy profile of the N<sub>2</sub> reduction reaction on Fe<sub>B</sub>/HMo<sub>2</sub>CF<sub>v</sub> through (a) distal, alternating, and (b) enzymatic mechanisms.

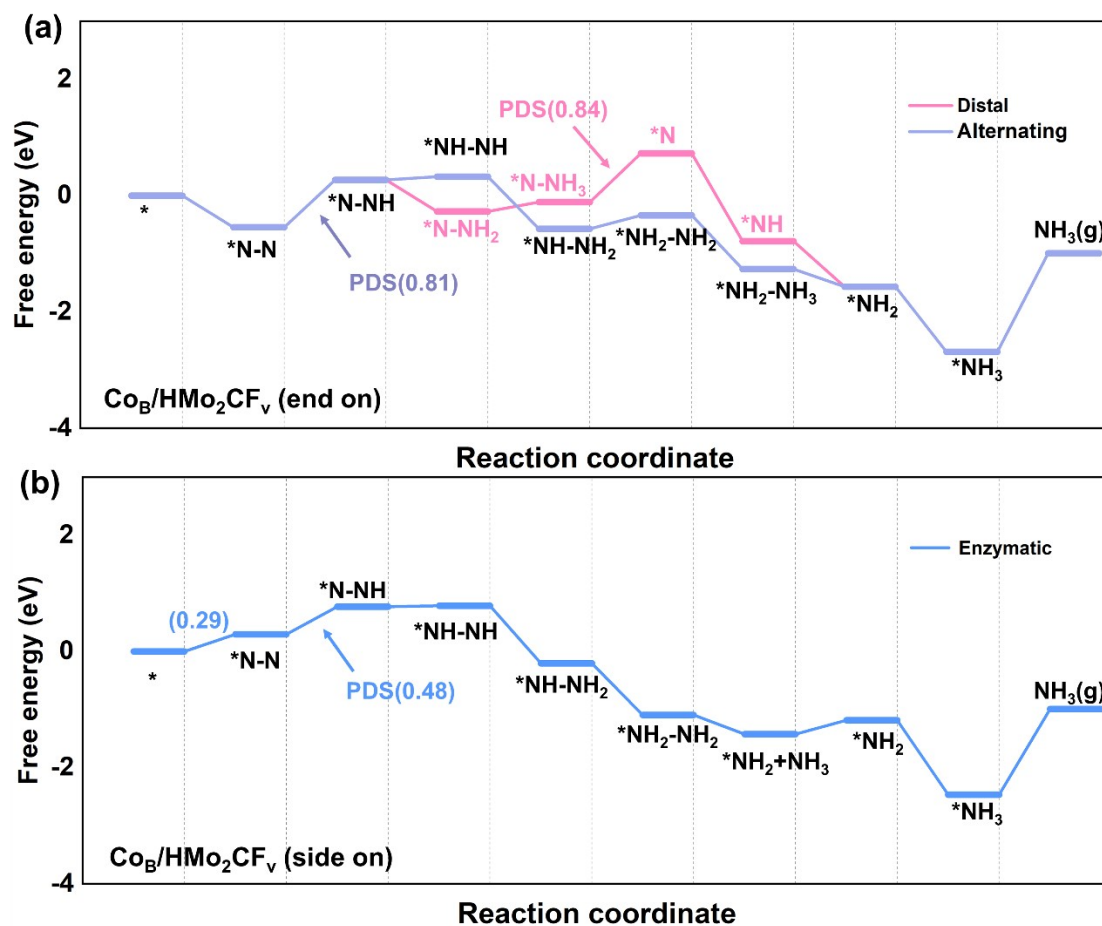

**Figure S10** Free energy profile of the  $\text{N}_2$  reduction reaction on  $\text{Co}_B/\text{HMo}_2\text{CF}_v$  through (a) distal, alternating, and (b) enzymatic mechanisms.

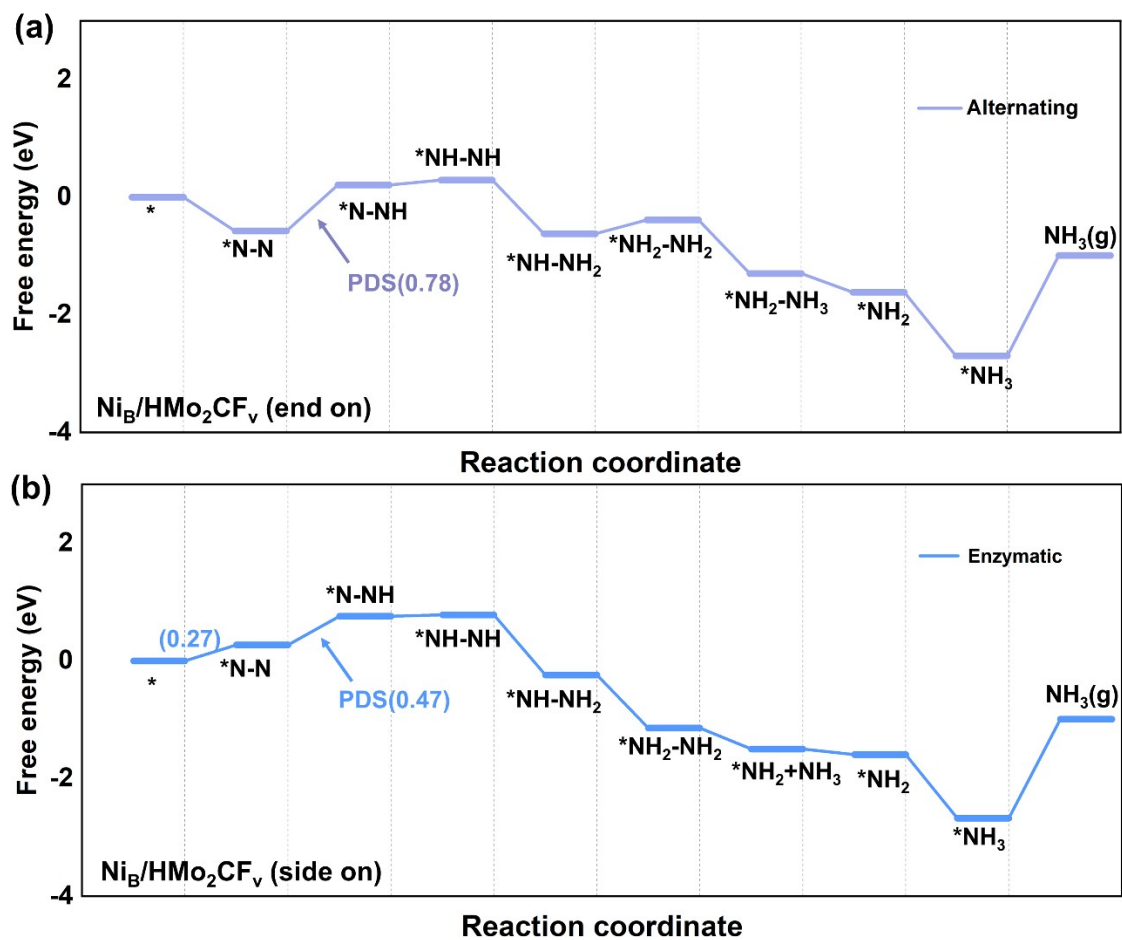

**Figure S11** Free energy profile of the N<sub>2</sub> reduction reaction on Ni<sub>B</sub>/HMo<sub>2</sub>CF<sub>v</sub> through (a) alternating, and (b) enzymatic mechanisms.

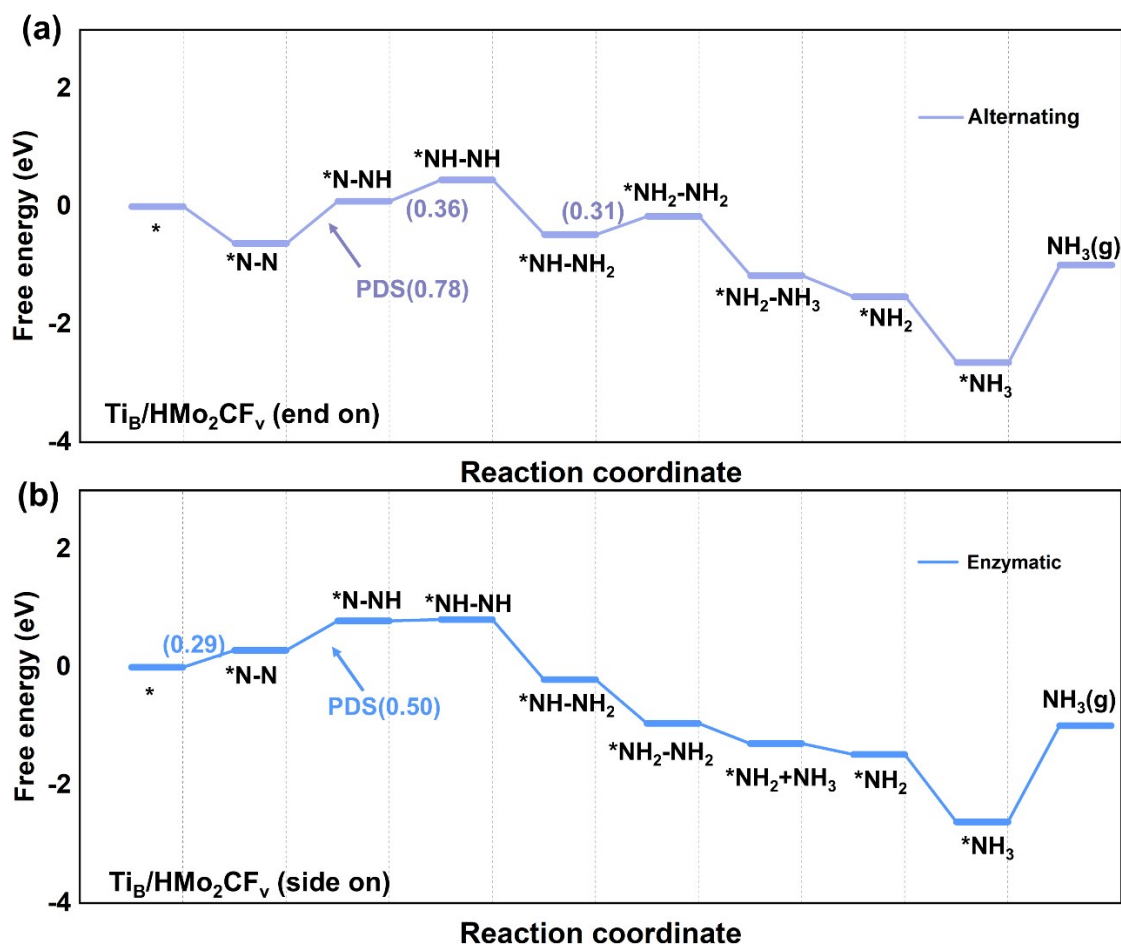

**Figure S12** Free energy profile of the N<sub>2</sub> reduction reaction on Ti<sub>B</sub>/HMo<sub>2</sub>CF<sub>v</sub> through (a) alternating, and (b) enzymatic mechanisms.

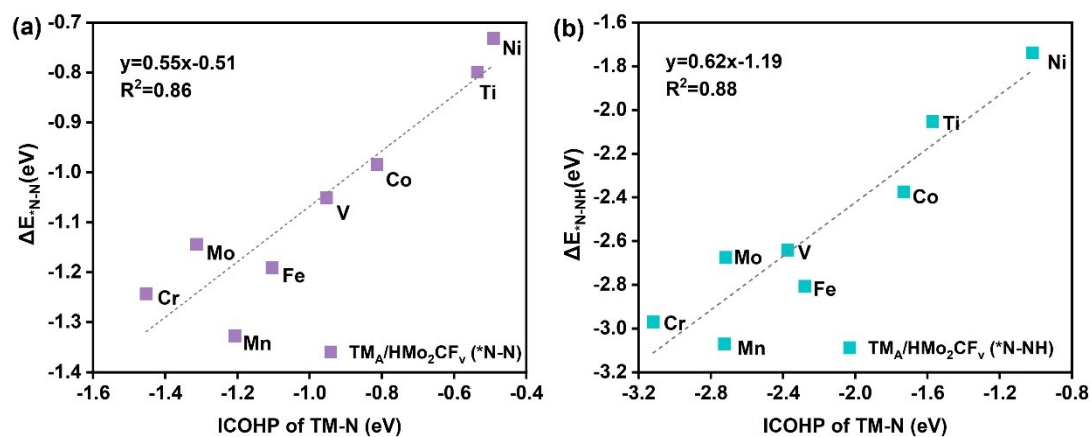

**Figure S13** The linear correlation relationship between ICOHP of TM-N and ΔE (\*N-N) for TM<sub>A</sub>/HMo<sub>2</sub>CF<sub>v</sub> (a) ICOHP of TM-N and ΔE (\*N-NH) for TM<sub>A</sub>/HMo<sub>2</sub>CF<sub>v</sub> (b).
